# Supplementary material
Source: PubMed Central journal article supplement (PMC5583006)
Supplement: NIHMS891224-supplement-FigS1.pdf [file NIHMS891224-supplement-FigS1.pdf]

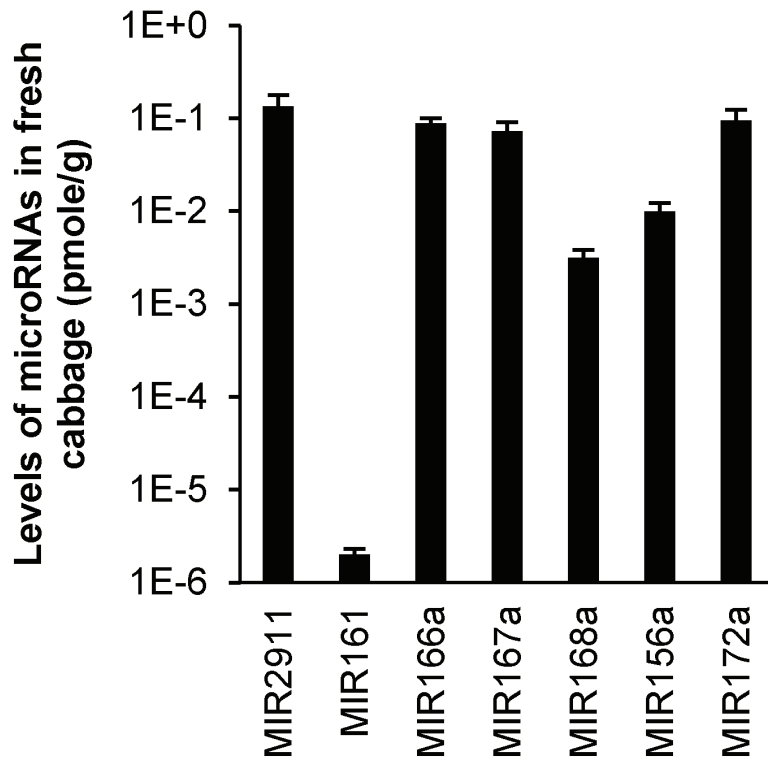

**Figure S1 microRNAs abundance profile in fresh cabbage**

The absolute levels of microRNAs were calculated by qRT-PCR using standard curves generated by synthetic RNAs.
