# Supplementary material
Source: PubMed Central journal article supplement (PMC5583006)

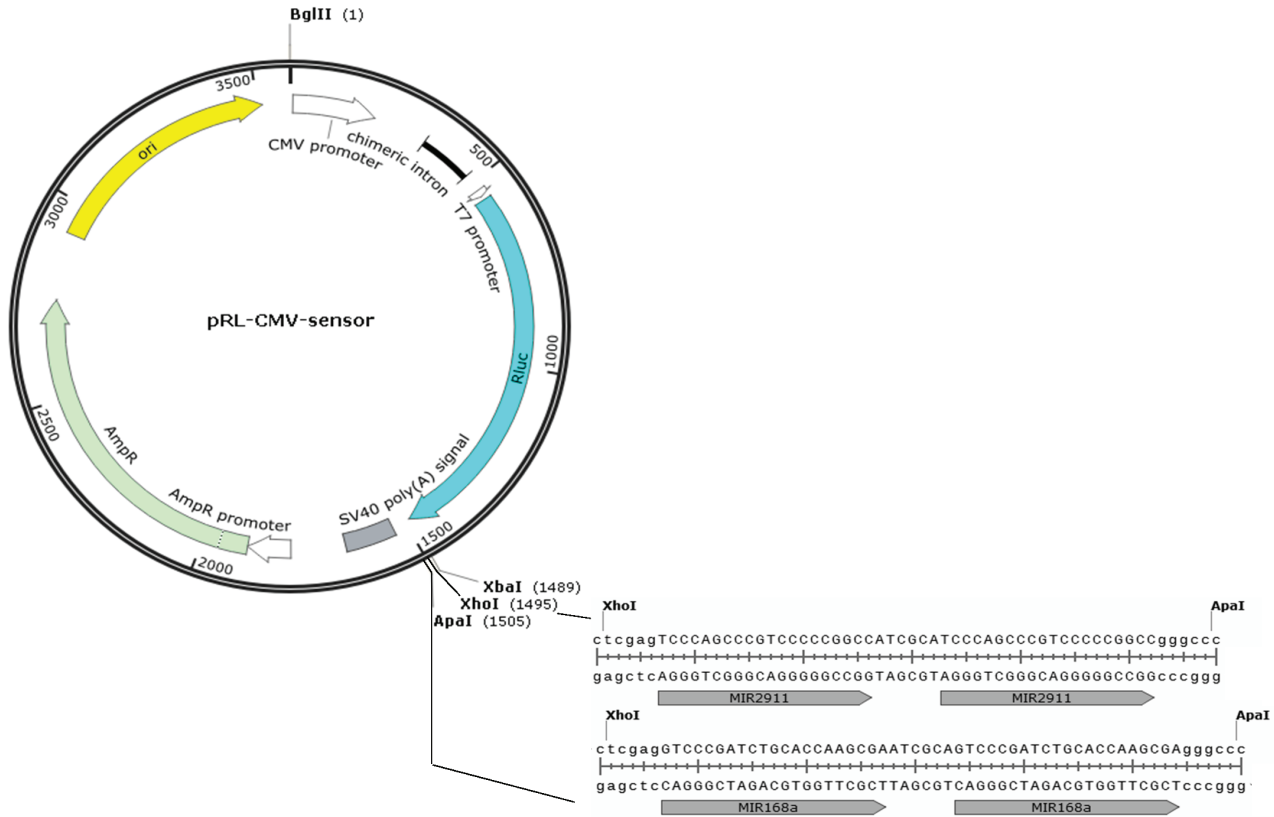

Supplemental Figure 2. Map of reporter constructs used in this study.

Supplement: NIHMS891224-supplement-FigS2.pdf [file NIHMS891224-supplement-FigS2.pdf]
